# Supplementary material
Source: publisher figshare collection journal article supplement (https://tandf.figshare.com/articles/dataset/_/12340568)
Supplement: Supplementary file 1 [file 1]

## Sheet: Table1
Supplementary table 1. List of the isolated strains
Isolate	Enrichment medium	Isolation medium	Related species	Similarity (%)	Arsenopyrite biooxidation
IBUN Pt1247 S1	9K + S0	Thiobacillus agar	A. thiooxidans	94.21	GMC
IBUN Pt1247 S3	9K + S0	Thiobacillus agar	A. thiooxidans	94.21	GMC
IBUN Pt1247 S6	9K + S0	Thiobacillus agar	A. thiooxidans	94.21	ND
IBUN Pt1247 S8	9K + S0	Thiobacillus agar	A. thiooxidans	94.21	ND
IBUN Pt1247 S10	9K + S0	Thiobacillus agar	A. thiooxidans	94.21	ND
IBUN Pt1247 S11	9K + S0	Thiobacillus agar	A. thiooxidans	94.21	ND
IBUN Pt1247 S12	9K + S0	Thiobacillus agar	A. thiooxidans	94.21	ND
IBUN Pt1247 S14	9K + S0	Thiobacillus agar	A. thiooxidans	94.21	ND
IBUN Pt1247 S15	9K + S0	Thiobacillus agar	A. thiooxidans	94.21	GMC
IBUN Pt1247 S16	9K + S0	Thiobacillus agar	A. thiooxidans	94.29	ND
IBUN Pt1247 S17	9K + S0	Thiobacillus agar	A. thiooxidans	94.21	ND
IBUN Pt1247 S19	9K + S0	Thiobacillus agar	A. thiooxidans	94.21	ND
IBUN PPt12	9K + FeSO4	9K + FeSO4 / Agarose	A. ferrianus	100	+
IBUN Pt359-10	9K + FeSO4	9K + FeSO4 / Agarose	A. ferriphilus	99.23	ND
IBUN Pt6114 Fe1	9K + FeSO4	9K + FeSO4 / Agarose	A. ferridurans	99.64	ND
IBUN Pt6114 Fe2	9K + FeSO4	9K + FeSO4 / Agarose	A. ferrooxidans	99.86	+
IBUN Pt6114 Fe3	9K + FeSO4	9K + FeSO4 / Agarose	A. ferridurans	100	ND
IBUN Pt6114 Fe3S	9K + FeSO4	Thiobacillus agar	Acidithiobacillus sp.	ND	ND
IBUN Pt6114 Fe5	9K + FeSO4	9K + FeSO4 / Agarose	A. ferridurans	100	+
IBUN Pt6114 Fe6	9K + FeSO4	9K + FeSO4 / Agarose	A. ferridurans	100	ND
+, positive; GMC, growth in mixed culture; ND, data not available

## Sheet: Table2
Supplementary table 2. List of the sequences used to construct the phylogenetic trees. T Type strain. * Possible new species
Group	Accession	Species	Name	Sample Origin	Sample Source	Sample Type	Ore Type	Country	Continent	Latitude	Longitude	Altitude (m.a.s.l.)
Indigenous strains	MG696165	A. thiooxidans	IBUN Pt1247 S1	Closed Mine	circum neutral water	Biofilm	Refractory sulfide	Colombia	South America	6069028	-75797961	1500
	MG696166.2	A. thiooxidans	IBUN Pt1247 S3	Closed Mine	circum neutral water	Biofilm	Refractory sulfide	Colombia	South America	6069028	-75797961	1500
	MG696167	A. thiooxidans	IBUN Pt1247 S6	Closed Mine	circum neutral water	Biofilm	Refractory sulfide	Colombia	South America	6069028	-75797961	1500
	MG696168	A. thiooxidans	IBUN Pt1247 S8	Closed Mine	circum neutral water	Biofilm	Refractory sulfide	Colombia	South America	6069028	-75797961	1500
	MG696169	A. thiooxidans	IBUN Pt1247 S10	Closed Mine	circum neutral water	Biofilm	Refractory sulfide	Colombia	South America	6069028	-75797961	1500
	MG696170	A. thiooxidans	IBUN Pt1247 S11	Closed Mine	circum neutral water	Biofilm	Refractory sulfide	Colombia	South America	6069028	-75797961	1500
	MG696171	A. thiooxidans	IBUN Pt1247 S12	Closed Mine	circum neutral water	Biofilm	Refractory sulfide	Colombia	South America	6069028	-75797961	1500
	MG696172	A. thiooxidans	IBUN Pt1247 S14	Closed Mine	circum neutral water	Biofilm	Refractory sulfide	Colombia	South America	6069028	-75797961	1500
	MG696173	A. thiooxidans	IBUN Pt1247 S15	Closed Mine	circum neutral water	Biofilm	Refractory sulfide	Colombia	South America	6069028	-75797961	1500
	MG696174	A. thiooxidans	IBUN Pt1247 S16	Closed Mine	circum neutral water	Biofilm	Refractory sulfide	Colombia	South America	6069028	-75797961	1500
	MG696175	A. thiooxidans	IBUN Pt1247 S17	Closed Mine	circum neutral water	Biofilm	Refractory sulfide	Colombia	South America	6069028	-75797961	1500
	MK159397.2	A. ferrianus	IBUN PPt12	Closed Mine	circum neutral water	Biofilm	Refractory sulfide	Colombia	South America	6069028	-75797961	1500
	MG696179	A. ferridurans	IBUN Pt6114 Fe1	Closed Mine	circum neutral water	Biofilm	Refractory sulfide	Colombia	South America	6069028	-75797961	1500
	MG696180	A. ferrooxidans	IBUN Pt6114 Fe2	Closed Mine	circum neutral water	Biofilm	Refractory sulfide	Colombia	South America	6069028	-75797961	1500
	MK159398	A. ferridurans	IBUN Pt6114 Fe5	Closed Mine	circum neutral water	Biofilm	Refractory sulfide	Colombia	South America	6069028	-75797961	1500
	MK159399	A. ferridurans	IBUN Pt6114 Fe6	Closed Mine	circum neutral water	Biofilm	Refractory sulfide	Colombia	South America	6069028	-75797961	1500
Outgroup	NR_042145	T. tepidarius	DSM 3134										Reference
Validated Species	NR_028982	A. albertensisT	DSM 14366		Soil	acidic soil	sulfur stockpile	Canada	North America
	NR_026517	A. caldusT	ATCC 51756			coal spoil							Hallberg and Lindström, 1994
	NR_117036	A. ferriduransT	ATCC 33020	Mine		water	Uranium	Japan	Asia				Hedrich and Johnson, 2013
	NR_074193	A. ferrooxidansT	ATCC 23270	Mine	Water	Effluent	Bituminous Coal	USA	North America	41.2033	-77.1945	176.5
	NR_114620	A. ferrivoransT	SS3	Mine		Mine drainage	copper	Norway	Europe				Hallberg et al., 2010
	KX894728	A. thiooxidans	ATCC 21835	Natural	Hot spring	Soil		Japan	Asia
	KX894722	A. thiooxidans	ATCC 19703	Industrial		Sewage	Concrete sewer
	NR_044920	A. thiooxidansT	ATCC 19377			Clay
	AF362022	A. ferrooxidans	ATCC 19859	Mine		water							Kelly and Wood, 2000
	MK193868	A. sulfuriphilusT	CJ-2	Mine	Circum-neutral drainage	water	copper	Wales	Europe				Falagán et al., 2019
	KX894704	A. ferrooxidans	DSM 1927	Mine				Austria	Europe
	MN733279	A. ferrianus*	Strain MG	Natural	Acidic pond	Water		Greece	Europe				Norris et al., 2020
	KR905751	A. ferriphilus T	DSM 100412	natural	volcanic, solfatara	soil	sulfur	Montserrat	Central America	16.7425	-62.1874	324.2	Falagán and Johnson, 2016
Other strains or clone sequences Suppl. Figure 1	KY608911	Acidithiobacillus*	RW2					UK	Europe				Moya et al., 2018
	KX894723	Acidithiobacillus*	GG1/14	natural		Volcanic, geothermal pool							Moya et al., 2018
	AM502930	A. ferrooxidans*	LMT1	Mine		Mine tailings		China	Asia				Tan et al. 2008
	DQ834372	A. thiooxidans*	AAU	NA	NA	soil	NA	India	Asia	20.5937	78.9629	248	Nareshkumar et al., 2008
	JQ820325	A. thiooxidans*	ZMB	Industrial	mine, HD	NA	copper	Zambia	Africa	-12.6339	28.0537	1298	Ngom et al., 2015
	DQ909079	A. ferrooxidans	AFc	Natural	Sea	Sediment		China	Asia
	DQ676505	A. ferrooxidans	BY-3	Mine	Acid drainage		Copper	China	Asia
	EU084706	A. thiooxidans	LYS	Mine		Soil	Copper	China	Asia
	EF059760	A. thiooxidans	JY	Mine	Efluent	water	Coal	China	Asia
	FJ154514	A. thiooxidans	A01	Mine		AMD	Copper	China	Asia
	EF010878	A. ferrooxidans	SRHGM	Mine	Biorreactor		Gold	India	Asia
	JX989241	Acidithiobacillus	Clone G5 - uncultured		geothermal pools			Argentina	South America
	JN982092	A. ferrooxidans	clone U2V - uncultured	natural		Acidic river		Argentina	South America
	KX894711	A. ferridurans	DSM 9465					Australia	Oceania
	X75268	A. ferrooxidans	N-Fe3					Australia	Oceania
	X75269	A. thiooxidans	B-S3					Australia	Oceania
	AY552088	A. thiooxidans	DAMS					Brasil	South America
	AF329204	Acidithiobacillus	SSP	Mine		Wastes		Brasil	South America
	KX894709	A. ferridurans	D2PG	Mine				Chile	South America
	KJ679874	A. ferrivorans	ACH	Natural	Andeans Plateau			Chile	South America
	KR905754	A. ferriphilus	PS104	Mine			Copper/Zinc	Finland	Europe
	KR905756	A. ferriphilus	Malay	Mine		Mine drainage		Malaysia	Asia
	EU839490	A. ferrivorans	Peru6	Mine	Abandoned mine	AMD		Perú	South America
	FN686783	A. ferrooxidans	A1	Mine	Disused mine		Sulfidic ore	German	Europe
	KU249598	Acidithiobacillus	La10a	Natural	Cave biofilm			Mexico	Central America
	KX894706	A. ferridurans	B5	Mine		AMD		France	Europe
	KJ573102	A. ferrooxidans	XZ11	Mine		AMD		China	Asia
	KP779620	Acidithiobacillus	FJ2	Mine			Uranium	Iran	Asia
	KM192210	A. ferrooxidans	TFBK	Mine			Sulfide ore	Kazakhstan	Asia
	GU168009	A. ferrooxidans	BGR:107	Mine		Soil		Namibia	Africa
	AF465605	A. ferrooxidans	TFN-d	Mine			Gold	Siberia	Asia
	AJ457806	A. ferrooxidans	BRGM1	Mine				South Africa	Africa
	AJ457804	A. ferrooxidans	CC1	Mine				France	Europe
	JX442933	A. ferrooxidans	CF3	Mine		Drainage	Cobalt	USA	North America
